# Supplementary material for: Felipe V, un proyecto ilustrado para España
Source: Royal Society of Chemistry journal article supplement (doi:10.1039/d0ra02591g), 2008-01-01
Supplement: d0ra02591g1.pdf [file d0ra02591g1.pdf]

## Supporting Information

### **A novel ethanol gas sensor based on $\alpha$ -Bi<sub>2</sub>Mo<sub>3</sub>O<sub>12</sub>/Co<sub>3</sub>O<sub>4</sub> nanotube-decorated particles**

*Salah Ud Din<sup>a</sup>, Mahmood ul Haq<sup>a</sup>, Rabia Khatoon<sup>a</sup>, Xuehua Chen<sup>a</sup>, Li Li<sup>b</sup>, Manjun Zhang<sup>b</sup>,  
Liping Zhu<sup>a,\*</sup>*

<sup>a,\*</sup> State Key Laboratory of Silicon Materials, School of Materials Science and Engineering, Cyrus Tang Center for Sensor Materials and Applications, Zhejiang University, Hangzhou 310027, China.

<sup>b</sup> Electric Power Research Institute of Guangdong Power Grid Co., Ltd, China.

\* Corresponding author: Liping Zhu.

Tel.: +86 571 8795 1958.

E-mail address: [zjuzlp@163.com](mailto:zjuzlp@163.com)

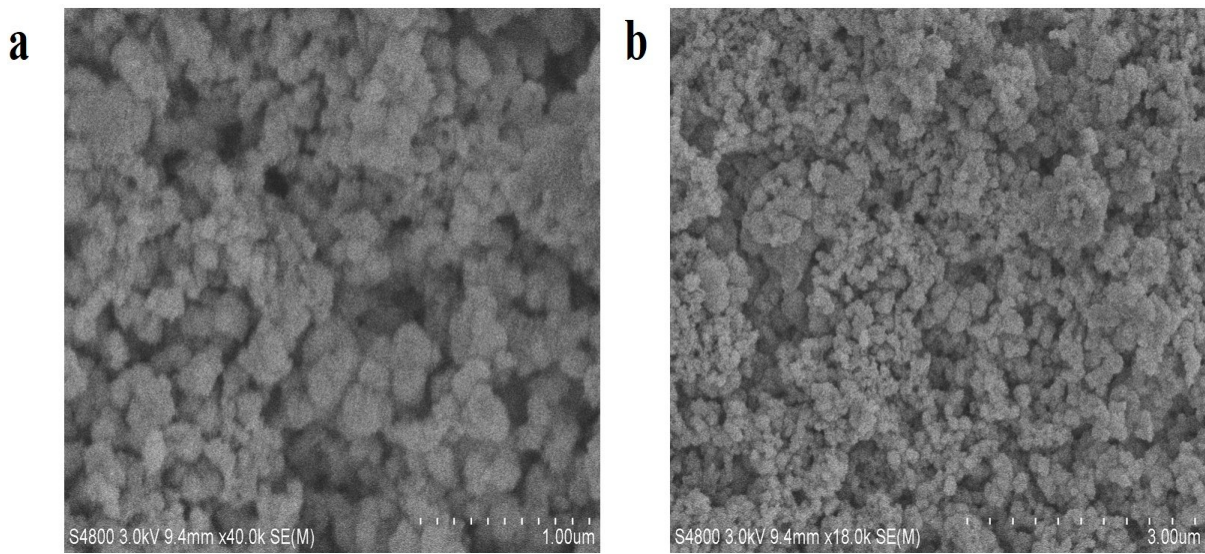

*Figure. S1(a, b). Schematic diagram shows SEM high and low magnification the  $\text{Co}_3\text{O}_4$  nanoparticles.*

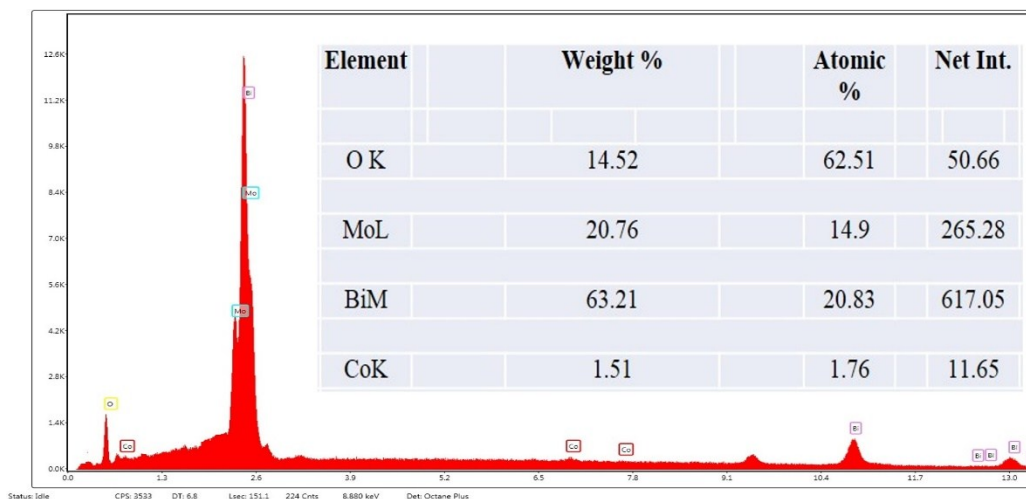

Figure S2. Schematic diagram shows the EDS spectrum of composite based on  $\alpha$ - $\text{Bi}_2\text{Mo}_3\text{O}_{12}/\text{Co}_3\text{O}_4$  nanotube-decorated with  $\text{Co}_3\text{O}_4$  nanoparticles.

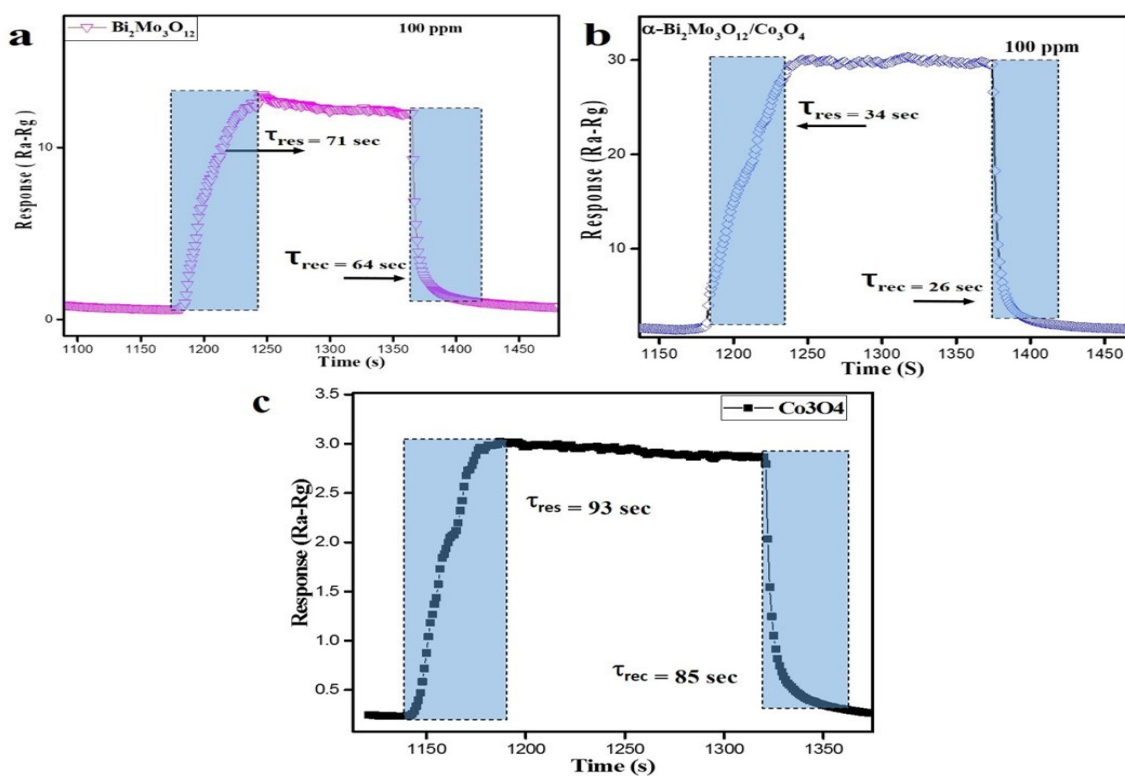

Figure S3(a-c). (a) Schematic diagram shows response and recovery features of pure  $\alpha$ - $\text{Bi}_2\text{Mo}_3\text{O}_{12}$  nanofibers (b) The Response/Recovery feature of composite based on  $\alpha$ - $\text{Bi}_2\text{Mo}_3\text{O}_{12}/\text{Co}_3\text{O}_4$  nanotube-decorated particles while (c) show Response/Recovery feature of  $\text{Co}_3\text{O}_4$  nanoparticles.

### **Hall Experiment:**

We carried out Hall measurement experiment with model Nanometric, HL5500 of our powder samples based on pure  $\text{Co}_3\text{O}_4$  nanoparticles and  $\alpha\text{-Bi}_2\text{Mo}_3\text{O}_{12}$  nanofibers, which somewhat exposed p-type behavior of  $\text{Co}_3\text{O}_4$  and n-type behavior of  $\alpha\text{-Bi}_2\text{Mo}_3\text{O}_{12}$ . Our response about this comment that introduced into the revised manuscript as follow:

“The electrical resistivity, carrier concentration, and mobility for powder sample based on pure  $\text{Co}_3\text{O}_4$  nanoparticles and  $\alpha\text{-Bi}_2\text{Mo}_3\text{O}_{12}$  nanofibers were obtained by the four-probe van der Pauw method using Hall-effect measurement system with model Nanometric, HL5500 in a magnetic field strength of 0.508 T, as exposed in **Table S1**. Based on these measurements, it can be seen that the  $\text{Co}_3\text{O}_4$  nanoparticles sample exhibit *p*-type conduction due to positive Hall coefficient of  $1.42 \times 10^6 \text{ m}^2/\text{C}$  having low resistivity of  $2.976 \times 10^7 \text{ }\Omega\text{-cm}$ , charge mobility of  $47.8 \text{ cm}^2/\text{V-s}$  and high carrier concentration of  $4.388 \times 10^9 \text{ cm}^{-3}$  were achieved. While,  $\alpha\text{-Bi}_2\text{Mo}_3\text{O}_{12}$  nanofibers sample exhibit *n*-type conduction due to negative Hall coefficient of  $-7.86 \times 10^6 \text{ m}^2/\text{C}$  with having high resistivity of  $7.488 \times 10^7 \text{ }\Omega\text{-cm}$ , charge mobility of  $105 \text{ cm}^2/\text{V-s}$  and negative carrier concentration of  $-7.943 \times 10^8 \text{ cm}^{-3}$  were acquired.

Table S1: Hall effect measurement results for powder sample based on pure  $\text{Co}_3\text{O}_4$  nanoparticles and  $\alpha\text{-Bi}_2\text{Mo}_3\text{O}_{12}$  nanofibers at ambient temperature.

| Sample Code.                                            | Resistivity R (ohm-cm) | Hall coefficient RHs ( $\text{m}^2/\text{C}$ ) | Carrier density N ( $/\text{cm}^3$ ) | Mobility ( $\text{cm}^2/\text{V-s}$ ) |
|---------------------------------------------------------|------------------------|------------------------------------------------|--------------------------------------|---------------------------------------|
| $\text{Co}_3\text{O}_4$ nanoparticles                   | $2.976 \times 10^7$    | $+1.42 \times 10^6$                            | $+4.388 \times 10^9$                 | 47.8                                  |
| $\alpha\text{-Bi}_2\text{Mo}_3\text{O}_{12}$ nanofibers | $7.488 \times 10^7$    | $-7.86 \times 10^6$                            | $-7.943 \times 10^8$                 | 105                                   |

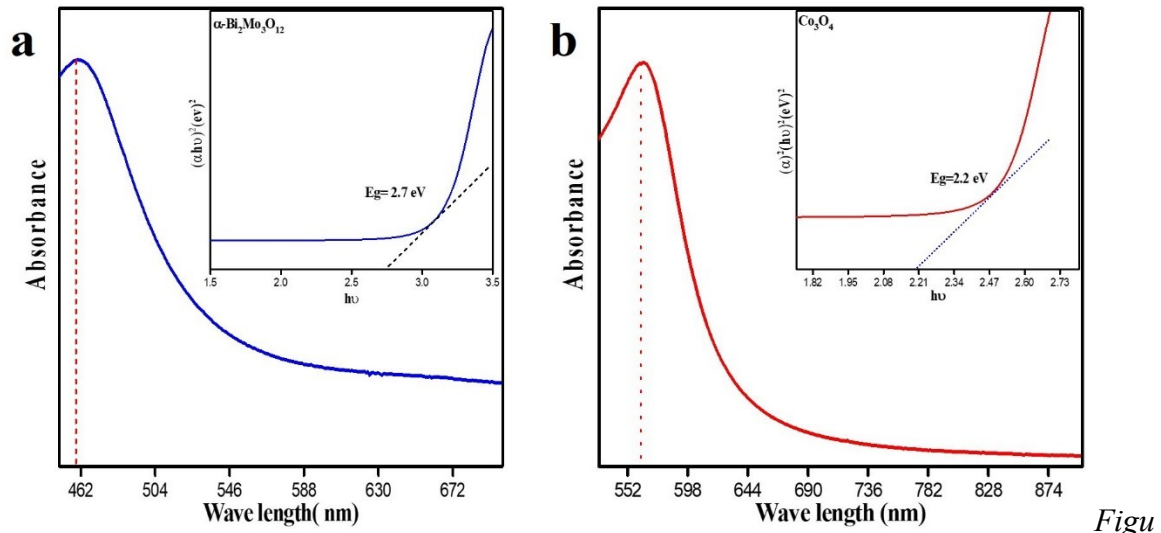

Figure S4(a, b). Photograph show UV-vis spectrum while insight figure shows bandgap energy of pure  $\alpha\text{-Bi}_2\text{Mo}_3\text{O}_{12}$  nanofibers (b) Composite based on  $\alpha\text{-Bi}_2\text{Mo}_3\text{O}_{12}/\text{Co}_3\text{O}_4$  nanotube-decorated particles.
